# Supplementary material
Source: publisher site journal article supplement (https://www.dovepress.com/article/272527)
Supplement: Supplementary file 1 [file get_supplementary_file.php]

**Appendix 1.** Differences between the control group (mentally healthy) and each group of specific PCs.

| Variables | **Control group**a  **(377 cases)** | DDs | | ASD/AjD | | SSDs | | BDs | | GADs | |
| --- | --- | --- | --- | --- | --- | --- | --- | --- | --- | --- | --- |
| 219 cases | *p* valueb | 88 cases | *p* valueb | 51 cases | *p* valueb | 29 cases | *p* valueb | 19 cases | *p* valueb |
| Suicidal ingestions | **205 (54.8)** | 207 (95.0) | <0.001 | 83 (94.3) | <0.001 | 49 (96.1) | <0.001 | 26 (89.7) | <0.001 | 15 (78.9) | 0.056 |
| Previous suicide attempt | **6 (1.6)** | 34 (15.7) | <0.001 | 7 (8.0) | 0.001 | 14 (27.5) | <0.001 | 11 (39.3) | <0.001 | 0 (0.0) | >0.999 |
| Alcohol use disorder | **56 (14.9)** | 40 (18.3) | 0.264 | 30 (34.1) | <0.001 | 5 (9.8) | 0.333 | 7 (24.1) | 0.183 | 5 (26.3) | 0.177 |
| Illicit drug abuse | **3 (0.8)** | 12 (5.5) | <0.001 | 3 (3.4) | 0.085 | 2 (3.9) | 0.110 | 2 (7.1) | 0.041 | 0 (0) | >0.999 |
| Ingestion amount, mL | **50 (70)** | 100 (162.5) | 0.001 | 100 (200) | 0.002 | 150 (212.5) | <0.001 | 100 (197.5) | 0.004 | 50 (150) | 0.417 |
| ≥50 | **216 (70.6)** | 154 (86.0) | <0.001 | 56 (80.0) | 0.112 | 42 (91.3) | 0.003 | 20 (95.2) | 0.015 | 14 (82.4) | 0.413 |
| ≥100 | **139 (45.4)** | 106 (59.2) | 0.003 | 40 (57.1) | 0.077 | 33 (71.7) | <0.001 | 15 (71.4) | 0.021 | 8 (47.1) | 0.895 |
| ≥300 | **25 (8.2)** | 33 (18.4) | <0.001 | 14 (20.0) | 0.003 | 11 (23.9) | 0.001 | 5 (23.8) | 0.016 | 2 (11.8) | 0.643 |
| EGD grade ≥ 2b | **179 (52.0)** | 110 (64.0) | 0.010 | 42 (53.8) | 0.772 | 22 (53.7) | 0.844 | 13 (52.0) | 0.997 | 14 (82.4) | 0.022 |
| EGD grade ≥ 3a | **127 (36.9)** | 94 (54.7) | <0.001 | 34 (43.6) | 0.273 | 15 (36.6) | 0.967 | 8 (32.0) | 0.622 | 12 (70.6) | 0.005 |
| Admission | **211 (56.6)** | 175 (80.6) | <0.001 | 59 (67.0) | 0.073 | 33 (66.0) | 0.205 | 20 (71.4) | 0.125 | 15 (83.3) | 0.028 |
| Hospital stay, days | **5 (9)** | 11.5 (20) | <0.001 | 8 (11) | 0.010 | 8.5 (16.5) | 0.025 | 10 (14) | 0.007 | 10.5 (10) | 0.034 |
| ICU admittance | **37 (10.4)** | 54 (25.4) | <0.001 | 11 (12.5) | 0.563 | 10 (20.8) | 0.033 | 5 (17.9) | 0.221 | 4 (22.2) | 0.121 |
| Surgical intervention | **50 (13.3)** | 54 (24.9) | <0.001 | 13 (14.8) | 0.709 | 9 (18.0) | 0.362 | 4 (14.3) | 0.778 | 4 (22.2) | 0.288 |
| Endoscopic dilatation | **34 (9.0)** | 36 (16.6) | 0.006 | 9 (10.2) | 0.730 | 4 (7.8) | >0.999 | 3 (10.3) | 0.739 | 4 (22.2) | 0.084 |
| Systemic complications | **90 (24.2)** | 77 (35.5) | 0.003 | 26 (29.5) | 0.298 | 15 (30.0) | 0.373 | 8 (28.6) | 0.603 | 4 (22.2) | >0.999 |
| Aspiration injury | **51 (13.7)** | 47 (21.7) | 0.013 | 16 (18.2) | 0.289 | 11 (22.0) | 0.122 | 2 (7.1) | 0.561 | 3 (16.7) | 0.726 |
| Respiratory failure | **31 (8.4)** | 40 (18.3) | <0.001 | 9 (10.2) | 0.576 | 8 (16.0) | 0.080 | 4 (14.3) | 0.292 | 2 (11.1) | 0.658 |
| Hepatic injury | **20 (5.4)** | 18 (8.3) | 0.170 | 5 (5.7) | 0.918 | 1 (2.0) | 0.492 | 3 (10.7) | 0.214 | 2 (11.1) | 0.272 |
| Renal injury | **23 (6.2)** | 23 (10.6) | 0.056 | 10 (11.4) | 0.093 | 2 (4.0) | 0.754 | 3 (10.7) | 0.414 | 2 (11.1) | 0.325 |
| GI complications | **105 (27.9)** | 91 (41.7) | <0.001 | 23 (26.1) | 0.792 | 18 (35.3) | 0.276 | 10 (34.5) | 0.451 | 8 (42.1) | 0.182 |
| Stricture | **64 (17.0)** | 60 (27.5) | 0.002 | 12 (13.6) | 0.446 | 11 (21.6) | 0.418 | 6 (20.7) | 0.610 | 7 (36.8) | 0.028 |
| Bleeding | **53 (14.3)** | 36 (16.6) | 0.452 | 10 (11.4) | 0.474 | 8 (16.0) | 0.746 | 7 (25.0) | 0.126 | 2 (11.1) | >0.999 |
| Perforation | **10 (2.7)** | 13 (6.0) | 0.047 | 5 (5.7) | 0.158 | 1 (2.0) | >0.999 | 1 (3.6) | 0.557 | 1 (5.6) | 0.411 |
| Fistula | **2 (0.5)** | 0 (0.0) | >0.999 | 3 (3.4) | 0.051 | 0 (0.0) | >0.999 | 0 (0) | >0.999 | 0 (0) | >0.999 |

**Notes:** Data are presented as number (%) or median (IQR). The calculation of percentage excluded patients with missing values from chart review.

a The control group included 377 cases without PCs. b The *p* values showed the differences between the control group and each psychiatric comorbidity.

**Abbreviations:** ASD/AjD, acute stress disorder or adjustment disorder; BDs, bipolar disorders; DDs, depressive disorders; EGD, esophagogastroduodenoscopy; GAD, generalized anxiety disorder; ICU, intensive care unit; IQR, interquartile range; GI, gastrointestinal; PCs, psychiatric comorbidities; SSDs, schizophrenia spectrum disorders.
