# Supplementary material
Source: publisher site journal article supplement (https://www.dovepress.com/article/272527)
Supplement: Supplementary file 2 [file get_supplementary_file.php]

**Appendix 2.** Clinical features and univariate analyses of overall survival in patients with PCs.

| Feature | Case  Number | Overall survival (%) | | | | | | *p* valuea |
| --- | --- | --- | --- | --- | --- | --- | --- | --- |
| 3 mo. | 6 mo. | 1 yr. | 3 yr. | 5 yr. | 10 yr. |
| Sex |  |  |  |  |  |  |  | 0.022 |
| Female | 235 | 91.8 | 90.3 | 88.0 | 82.8 | 79.4 | 64.4 |  |
| Male | 155 | 88.9 | 85.7 | 83.0 | 76.0 | 64.9 | 34.3 |  |
| Age |  |  |  |  |  |  |  | 0.002 |
| *<*65 | 293 | 93.0 | 91.7 | 89.8 | 85.3 | 81.5 | 61.5 |  |
| ≥65 | 97 | 84.6 | 80.0 | 75.8 | 64.6 | 52.5 | 34.5 |  |
| Urgent EGD survey |  |  |  |  |  |  |  | 0.005 |
| Grade *<*2b | 135 | 100 | 100 | 98.5 | 96.1 | 94.7 | 82.4 |  |
| Grade ≥2b | 190 | 90.3 | 87.5 | 83.7 | 76.6 | 71.6 | 55.6 |  |
| ETT + MV during EGD |  |  |  |  |  |  |  | *<*0.001 |
| No requirement | 278 | 97.4 | 96.8 | 95.1 | 91.6 | 88.4 | 77.4 |  |
| Required | 47 | 73.0 | 63.9 | 57.6 | 46.2 | 41.7 | 16.7 |  |
| Incomplete EGD |  |  |  |  |  |  |  | 0.022 |
| Complete | 285 | 93.5 | 93.3 | 91.2 | 85.8 | 82.5 | 67.8 |  |
| Incomplete | 40 | 93.8 | 80.0 | 73.1 | 72.0 | 63.6 | 33.3 |  |
| ICU admittance |  |  |  |  |  |  |  | *<*0.001 |
| No | 303 | 96.7 | 96.1 | 94.5 | 91.0 | 87.9 | 75.9 |  |
| Yes | 84 | 73.3 | 66.7 | 60.9 | 52.8 | 44.9 | 15.2 |  |
| Received surgery |  |  |  |  |  |  |  | 0.001 |
| No | 309 | 91.4 | 91.1 | 89.7 | 84.6 | 80.7 | 61.3 |  |
| Yes | 80 | 88.9 | 82.1 | 75.8 | 66.0 | 56.8 | 35.5 |  |
| **Systemic complications** |  |  |  |  |  |  |  | *<*0.001 |
| **Absent** | 258 | 98.3 | 97.1 | 96.1 | 92.7 | 89.8 | 76.7 |  |
| **Present** | 131 | 78.6 | 75.5 | 70.7 | 63.0 | 54.3 | 32.0 |  |
| Aspiration injury |  |  |  |  |  |  |  | *<*0.001 |
| Absent | 307 | 95.4 | 94.3 | 93.0 | 87.9 | 83.7 | 66.1 |  |
| Present | 82 | 76.7 | 71.8 | 66.7 | 62.1 | 55.6 | 32.4 |  |
| Respiratory failure |  |  |  |  |  |  |  | *<*0.001 |
| Absent | 324 | 96.2 | 95.1 | 94.1 | 90.0 | 86.0 | 70.8 |  |
| Present | 65 | 67.3 | 61.1 | 53.1 | 42.5 | 35.1 | 10.7 |  |
| DIC |  |  |  |  |  |  |  | *<*0.001 |
| Absent | 377 | 92.8 | 91.1 | 89.2 | 83.8 | 78.2 | 58.5 |  |
| Present | 12 | 41.7 | 27.3 | 27.3 | 27.3 | 27.3 | 8.3 |  |
| Hepatic injury |  |  |  |  |  |  |  | 0.011 |
| Absent | 359 | 91.6 | 89.7 | 87.7 | 81.9 | 76.8 | 56.1 |  |
| Present | 30 | 81.5 | 77.8 | 69.6 | 63.2 | 50.0 | 27.3 |  |
| Renal injury |  |  |  |  |  |  |  | *<*0.001 |
| Absent | 349 | 93.8 | 91.9 | 89.5 | 84.0 | 79.4 | 60.0 |  |
| Present | 40 | 67.6 | 64.7 | 61.3 | 55.6 | 40.9 | 22.2 |  |
| **GI complications** |  |  |  |  |  |  |  | *<*0.001 |
| **Absent** | 249 | 95.0 | 94.9 | 93.6 | 89.4 | 86.9 | 69.8 |  |
| **Present** | 141 | 85.4 | 80.8 | 76.8 | 69.0 | 60.0 | 39.2 |  |
| Bleeding |  |  |  |  |  |  |  | *<*0.001 |
| Absent | 325 | 95.3 | 93.4 | 91.6 | 86.7 | 83.2 | 64.7 |  |
| Present | 64 | 70.4 | 67.9 | 63.3 | 55.0 | 39.4 | 20.0 |  |
| Perforation |  |  |  |  |  |  |  | *<*0.001 |
| Absent | 368 | 93.3 | 91.9 | 90.0 | 85.0 | 80.3 | 61.3 |  |
| Present | 21 | 57.1 | 47.6 | 40.0 | 29.4 | 18.8 | 0 |  |
| Fistula |  |  |  |  |  |  |  | *<*0.001 |
| Absent | 381 | 91.8 | 90.1 | 87.7 | 82.1 | 76.3 | 55.7 |  |
| Present | 8 | 50.0 | 37.5 | 28.6 | 16.7 | 16.7 | 0 |  |

**Notes:** a The *p* values were determined using log-rank tests.

**Abbreviations:** CI, confidence interval; DIC, disseminated intravascular coagulation; EGD, esophagogastroduodenoscopy; ETT + MV, endotracheal tube with mechanical ventilation; GI, gastrointestinal; ICU, intensive care unit; mo., month; yr., year
